# Supplementary material for: An integrative Bayesian Dirichlet-multinomial regression model for the analysis of taxonomic abundances in microbiome data
Source: PubMed Central journal article supplement (PMC5299727; doi:10.1186/s12859-017-1516-0), 2017-02-08
Supplement: 12859_2017_1516_MOESM1_ESM.pdf [file 12859_2017_1516_MOESM1_ESM.pdf]

## Additional File

### *An Integrative Bayesian Dirichlet-Multinomial Regression Model for the Analysis of Taxonomic Abundances in Microbiome data*

by W.D. Wadsworth, R. Argiento, M. Guindani,  
J. Galloway-Pena, S.A. Shelbourne, and M. Vannucci.

#### 1. Simulation study: comparison with other methods

Figure ?? shows boxplots of the selection performance values over the 30 replicated datasets with dispersion parameter  $\psi = 0.01$ . Our proposed model either outperforms or is commensurate with the competing methods on all metrics.

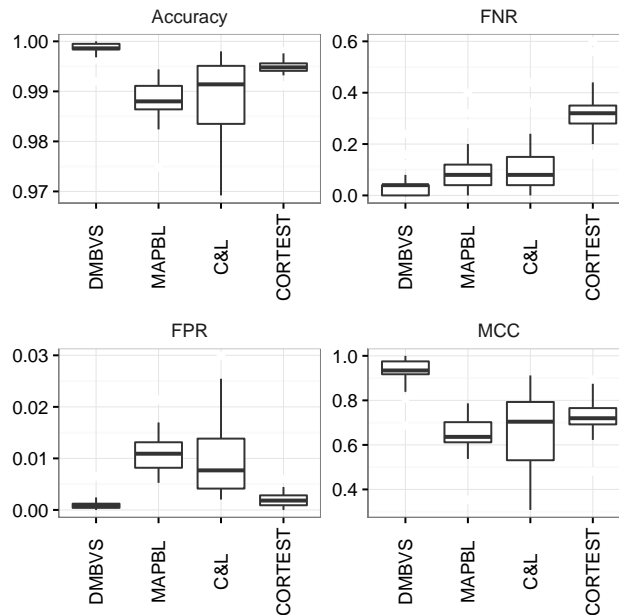

Figure 1: Simulated data: Comparison results of selection performances. DMBVS: Dirichlet–Multinomial Bayesian Variable Selection (our method), C&L: Chen and Li, MAPGL: Maximum A Posteriori Bayesian Lasso, CORTEST: Multiplicity Corrected Correlation Tests.

## 2. Simulation study: sensitivity analysis

We report the ROC curves obtained when investigating how sensitive the results are to varying values of the prior expected value of  $p_{pj}$ , i.e.  $m \in \{0.005, 0.01, 0.05\}$  and the slab variance  $r_{pj}^2 \in \{1, 10, 100\}$  in the variable selection procedure. The ROC curves complement the information provided by Table 2 in the main text.

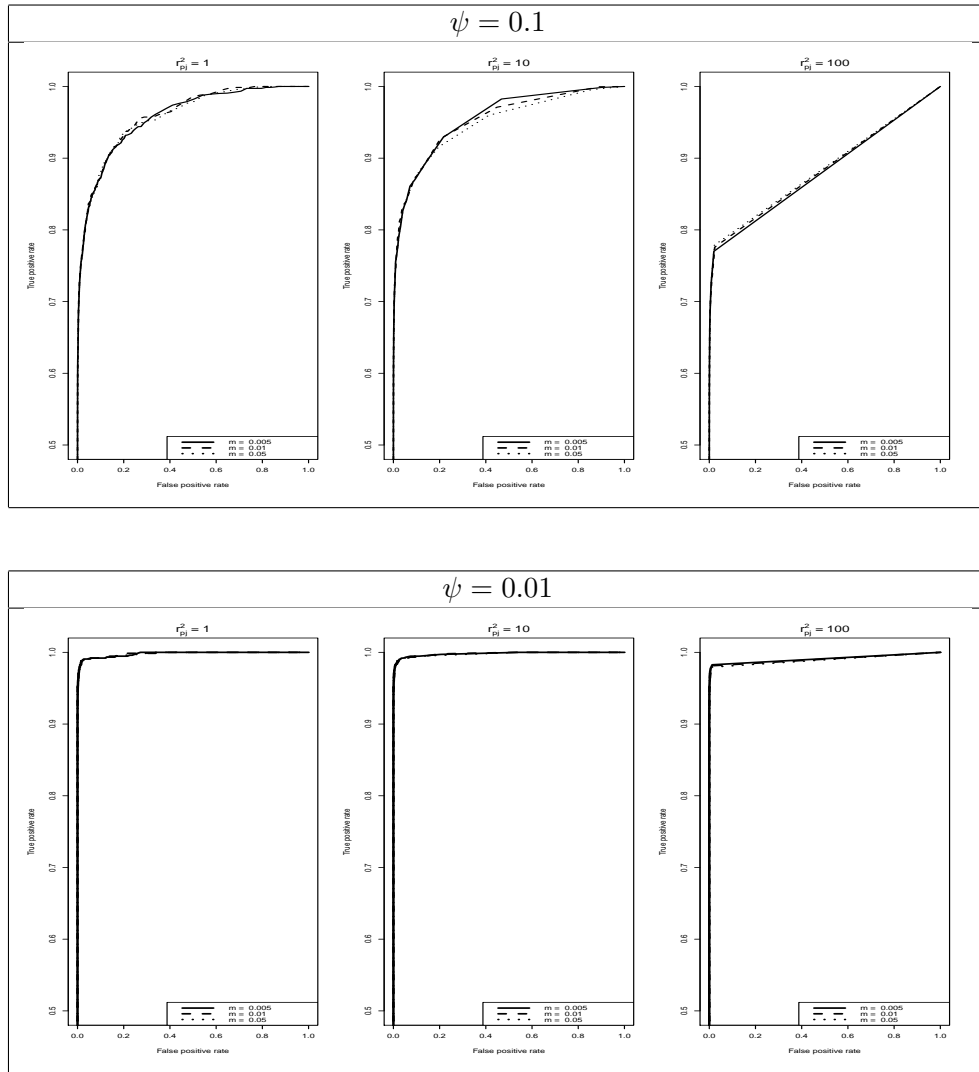

The results suggest that our procedure is quite robust to different specifications of relevant prior hyper-parameters.

---

In the Table below we evaluate the performance of our model for varying sample sizes  $n = \{50, 100, 500\}$  and for varying values of the over-dispersion parameter  $\psi = \{0.01, 0.1, 0.2\}$ . Results are obtained with  $r_{pj}^2 = 10$  and  $m = 0.01$  and supplement the information contained in Table 2 in the main text. Values are averages over 30 replicates. As expected, the results show that improved performance is achieved for larger sample sizes and decreasing overdispersion.

|               | $n = 50$ | $n = 100$ | $n = 500$ |
|---------------|----------|-----------|-----------|
| $\psi = 0.01$ |          |           |           |
| MCC           | 0.84     | 0.93      | 0.98      |
| FPR           | 0.00     | 0.00      | 0.00      |
| FNR           | 0.17     | 0.05      | 0.00      |
| ACC           | 1.00     | 1.00      | 1.00      |
| $\psi = 0.1$  |          |           |           |
| MCC           | 0.54     | 0.73      | 0.92      |
| FPR           | 0.00     | 0.00      | 0.00      |
| FNR           | 0.57     | 0.37      | 0.09      |
| ACC           | 0.99     | 0.96      | 1.00      |
| $\psi = 0.2$  |          |           |           |
| MCC           | 0.40     | 0.60      | 0.83      |
| FPR           | 0.00     | 0.00      | 0.00      |
| FNR           | 0.74     | 0.56      | 0.25      |
| ACC           | 0.99     | 0.99      | 1.00      |
